# Supplementary material for: Soil properties, root morphology and physiological responses to cotton stalk biochar addition in two continuous cropping cotton field soils from Xinjiang, China
Source: PeerJ. 2022 Feb 16;10:e12928. doi: 10.7717/peerj.12928 (PMC8857900; doi:10.7717/peerj.12928)
Supplement: Table S1 — Note: CK: control, 1% BC: 1% biochar addition, 3% BC: 3% biochar addition; Root SP content: Root soluble protein content, Root SS content: Root soluble sugar content, Root NR activity: Root nitrate reductase activity, Root GS activity: Root glutamine synthetase; RL: Root length, SRL: Specific root length, RSA: Root surface area, SRA: Specific root surface area, RV: Root volume, ARD: Average root diameter [file peerj-10-12928-s001.xlsx]

## Sheet: sheet1
Table 1 Soil nutrients, root physiology, morphology and biomass of two soil types in two periods
	treatment	Bud stage																					Harvesting stage
		Soil TN	Soil TP	Soil TK	Soil AN	Soil AP	Soil AK	Soil pH	Soil OM	Root activity	Root SP content	Root SS content	Root NR activity	Root GS activity	RL	SRL	RSA	SRA	RV	ARD	Underground Biomass	Aboveground Biomass	Soil TN	Soil TP	Soil TK	Soil AN	Soil AP	Soil AK	Soil PH	Soil OM	Root activity	Root SP content	Root SS content	Root NR activity	Root GS activity	RL	SRL	RSA	SRA	RV	ARD	Underground Biomass	Aboveground Biomass	Seed Cotton Yield
grey desert soil	CK	1.19	1.43757	35.281	45.5	49.78	565.42	7.91	26.24	0.45	5.17	5.32	35	41.88	6511.19	268.032	826.354	47.7938	12.2985	0.52183	17.29	73.54	1.26	0.8004	34.2793	49.7	37.8563	93.4459	7.96	39.025	0.798645	5.29231	0.628154	5.93235	55.2549	1922.43	31.6711	684.236	11.2724	19.38	1.1329	60.7	691.44	4.68
	CK	1.19	1.39512	34.642	47.6	61.19	539.66	7.96	26.24	0.45	4.81	4.88	38.07	46.72	7011.19	278.032	569.114	25.9514	12.7985	0.57183	21.93	71.75	1.19	0.877939	33.6778	50.05	37.0534	93.4459	8.08	38.2781	0.665489	4.27692	0.636231	5.93235	55.2549	1286.4	24.5497	511.764	9.7665	16.201	1.2663	52.4	531.18	4.3
	CK	1.19	1.17934	30.9	46.2	53.72	541.09	7.98	32.77	0.45	4.42	5.17	33.47	45.68	6011.19	258.032	697.734	31.8164	11.7985	0.47183	21.93	83.58	1.19	0.990495	37.1666	49	36.2505	93.4459	8.03	37.5312	0.00492098	4	0.950462	4.54467	55.2549	1604.42	28.3717	598	10.5747	17.7905	1.1996	56.55	586.1	4.73
	1% BC	1.4	1.37743	33.729	40.6	48.21	547.53	8	41.39	0.49	5.11	4.97	42.13	42.04	8704.99	342.778	916.153	47.8409	16.31	0.51694	19.15	54.64	1.26	0.872936	37.2869	35	40.265	93.4459	8.1	57.6972	0.396283	5.30769	1.07354	20.1561	59.3879	1926.55	57.1678	532.658	15.8059	11.719	0.8801	33.7	361.92	2.85
	1% BC	1.386	1.37036	35.738	52.5	60.79	562.56	8.04	45.35	0.5	4.97	4.02	47.26	44.32	8704.99	342.778	725.959	32.8637	16.31	0.51694	22.09	92.42	1.19	1.0055	37.2869	59.15	38.6592	94.3416	8.13	57.6972	0.560123	4.35385	1.07315	20.503	59.3879	3498.29	69.8261	714.35	14.2585	11.608	0.65	50.1	355.83	1.93
	1% BC	1.26	1.25716	34.916	49.7	49.78	503.16	8.03	42.55	0.47	4.19	4.43	38.07	78.76	8704.99	342.778	821.056	37.1687	16.31	0.51694	22.09	85.32	1.4	0.885443	34.6402	63	40.265	92.5502	8.08	56.9504	0.00492098	3.73077	1.12392	23.7988	59.3879	2712.42	64.7356	623.504	14.8808	11.6635	0.76505	41.9	409.36	2.91
	3% BC	1.61	1.44818	36.011	39.2	65.12	689.23	8.11	69.82	0.44	5.01	4.75	31.71	43.79	9373.88	320.643	937.977	46.6423	17.3675	0.52182	20.11	56.15	2.1	0.637819	36.926	39.9	46.2866	137.337	8.11	117.822	0.425809	3.41538	0.758154	15.8196	61.0076	1925.3	40.0938	629.574	13.1107	16.383	1.0409	48.02	616.55	4.98
	3% BC	1.68	1.25716	34.642	45.5	60.01	684.22	8.1	70.29	0.46	4.47	4.76	16.51	45.12	9373.88	320.643	779.572	33.8944	17.3675	0.52182	23	68.99	2.03	0.695348	38.3696	37.8	47.0895	137.337	8.08	118.195	0.3546	3.66923	0.754692	22.758	62.7646	2282.55	73.3232	509.103	16.3541	9.036	0.71	31.13	272.08	2.12
	3% BC	1.666	1.40573	39.571	39.9	57.26	693.53	8.14	75.41	0.45	4.7	4.01	24.99	54.01	9373.88	320.643	858.774	26.0235	17.3675	0.52182	33	104.47	2.1	1.15558	35.8432	38.85	44.2794	140.024	8.21	117.822	0.00492098	4.63846	0.400077	7.4935	75.4464	2103.93	53.163	569.338	14.3863	12.7095	0.87545	39.58	339.8	2.74
aeolian sandy soil	CK	0.63	1.16166	37.837	25.9	44.67	134.59	8.34	16.45	0.78	6.19	8.56	35.77	71.78	9354.61	312.199	1537.46	78.2819	16.531	0.48932	19.64	61.31	0.434	0.632816	35.7229	22.4	23.4043	14.6211	7.87	19.6059	1.24095	5.40769	0.769308	20.6765	20.2716	4021.06	117.54	681.717	19.9274	9.197	0.5397	34.21	262.83	2.11
	CK	0.56	1.09798	43.953	25.2	43.89	136.74	8.26	15.29	0.53	5.63	4.74	42.13	59.08	9354.61	312.199	1092.35	52.141	16.531	0.48932	20.95	76.04	0.532	0.602801	35.7229	24.5	22.6014	14.6211	7.92	19.2324	1.28264	4.48462	0.776231	16.5134	12.1558	4278.33	122.729	740.964	21.2554	10.212	0.5513	34.86	339.47	2.71
	CK	0.56	1.30315	36.468	25.2	44.67	134.59	8.28	12.03	0.05	5.52	6.47	35.77	78.41	9354.61	312.199	1314.91	39.9061	16.531	0.48932	32.95	106.11	0.49	0.70035	35.7229	22.05	20.5941	14.6211	7.98	19.6059	0.973485	3.88462	0.683538	23.9722	17.985	4149.69	120.159	711.34	20.5977	9.7045	0.5455	34.54	528.36	4.47
	1% BC	0.7	1.22886	39.48	25.9	42.71	164.65	8.18	22.28	0.58	6.42	3.19	43.9	32.2	12937.8	542.243	1400.49	64.8376	19.3445	0.45336	21.6	54.26	0.602	0.6003	35.7229	54.25	27.4187	12.8296	8.04	53.9628	0.784751	4.99231	0.392769	3.33044	15.4248	4326.19	93.5392	820.178	17.7336	12.374	0.6035	46.25	509.49	3.8
	1% BC	0.7	1.09445	46.052	28.7	38.38	163.94	8.19	20.65	0.5	4.97	3.55	39.84	24.58	12937.8	542.243	1260.06	67.455	19.3445	0.45336	18.68	93.88	0.686	0.567784	35.4823	49	26.2144	13.7254	8.12	53.5893	0.634227	3.82308	0.495846	7.32003	13.4178	5449.12	152.466	877.342	24.5479	11.241	0.5125	35.74	336.09	2.59
	1% BC	0.672	1.18995	41.306	28	37.99	163.94	8.25	23.44	0.31	5.75	3.95	35.24	48.65	12937.8	542.243	1330.28	71.2139	19.3445	0.45336	18.68	83.29	0.7	0.735368	35.8432	49	26.2144	12.8296	8.17	53.9628	0.498176	4.06923	0.270077	10.0954	15.8055	4887.66	119.226	848.76	20.704	11.8075	0.558	41	619.07	5.26
	3% BC	0.77	0.998939	26.701	21	44.67	185.41	8.04	42.09	0.66	5.3	17.06	28.17	31.91	14507.9	590.673	1425.61	70.9612	21.174	0.46374	20.09	79.88	0.952	0.512756	38.6102	21	34.2433	17.3083	8.1	95.0417	0.684594	5.63077	0.443154	22.4111	9.991	3791.19	88.6829	886.356	20.7335	16.49	0.7442	42.75	444.02	3.37
	3% BC	0.84	1.30315	39.571	21	59.61	183.97	8.29	42.09	0.65	5.45	13.72	32.24	26.7	14507.9	590.673	1477.76	69.5743	21.174	0.46374	21.24	72.14	0.91	0.750375	38.7305	19.95	31.4332	16.4126	8.1	94.2948	0.75812	4.46154	0.523154	32.1249	9.3694	11616.4	233.731	1535.98	30.905	19.719	0.5021	49.7	527.7	4.01
	3% BC	0.77	0.981	25.697	21.7	46.24	180.4	8.31	39.76	0.64	5.12	14.29	30.11	33.13	14507.9	590.673	1451.68	72.259	21.174	0.464	20.09	76.48	0.91	0.9	38.37	21.7	30.229	17.308	8.1	95.042	0.844	4.469	0.687	13.912	19.067	7703.82	166.659	1211.17	26.202	18.105	0.623	46.23	430.75	3.58
Note: CK: control, 1% BC: 1% biochar addition, 3% BC: 3% biochar addition; Root SP content: Root soluble protein content, Root SS content: Root soluble sugar content, Root NR activity: Root nitrate reductase activity, Root GS activity: Root glutamine synthetase; RL: Root length, SRL: Specific root length, RSA: Root surface area, SRA: Specific root surface area, RV: Root volume, ARD: Average root …
